# Supplementary material for: Hydrothermal conversion of high-concentrated glycerol to lactic acid catalyzed by bimetallic CuAux (x = 0.01–0.04) nanoparticles and their reaction kinetics
Source: Royal Society of Chemistry journal article supplement (doi:10.1039/c7ra04415a), 2017-01-01
Supplement: c7ra04415a1.pdf [file c7ra04415a1.pdf]

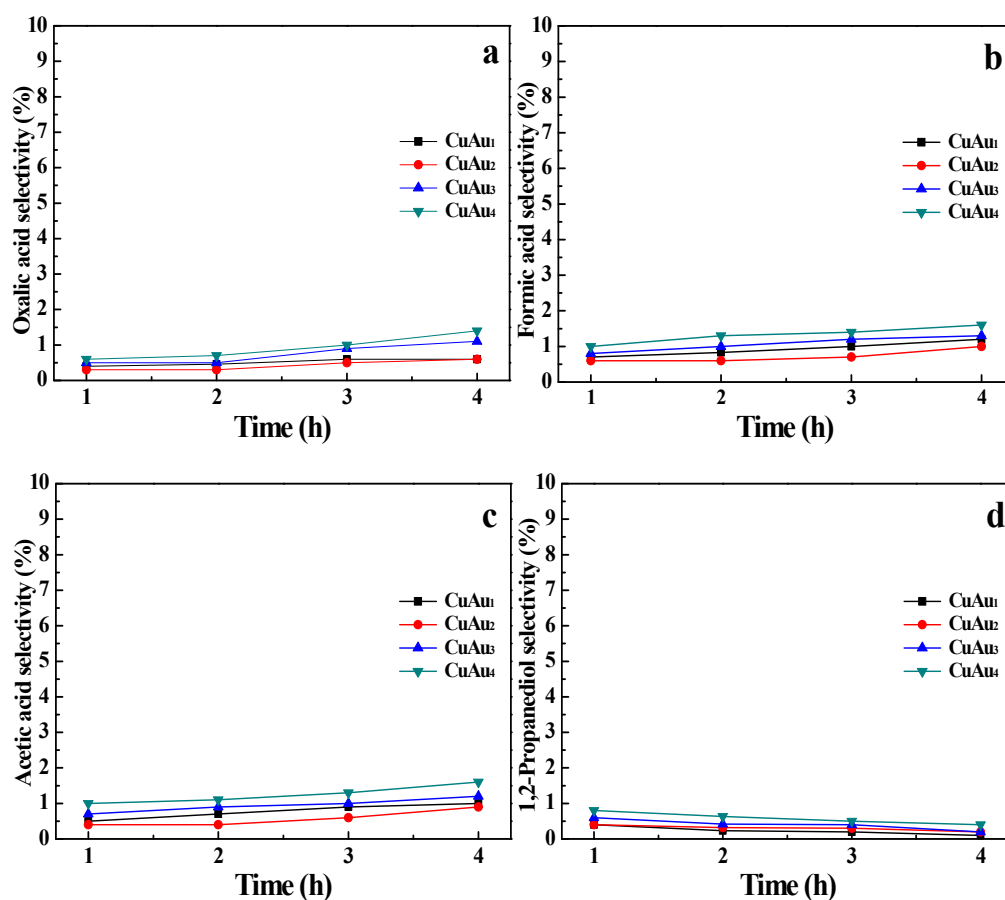

**Fig. S1.** Catalytic conversion of glycerol catalyzed by the bimetallic CuAu<sub>x</sub> nanoparticle catalysts. Reaction conditions: 100 mL of glycerol aqueous solution with the glycerol concentration of 2 mol L<sup>-1</sup>, NaOH/glycerol mole ratio of 1.1:1, 0.736 g of catalyst, and reaction temperature at 200 °C. (a) selectivity of oxalic acid; (b) selectivity of formic acid; (c) selectivity of acetic acid; (d) selectivity of 1,2-propanediol.

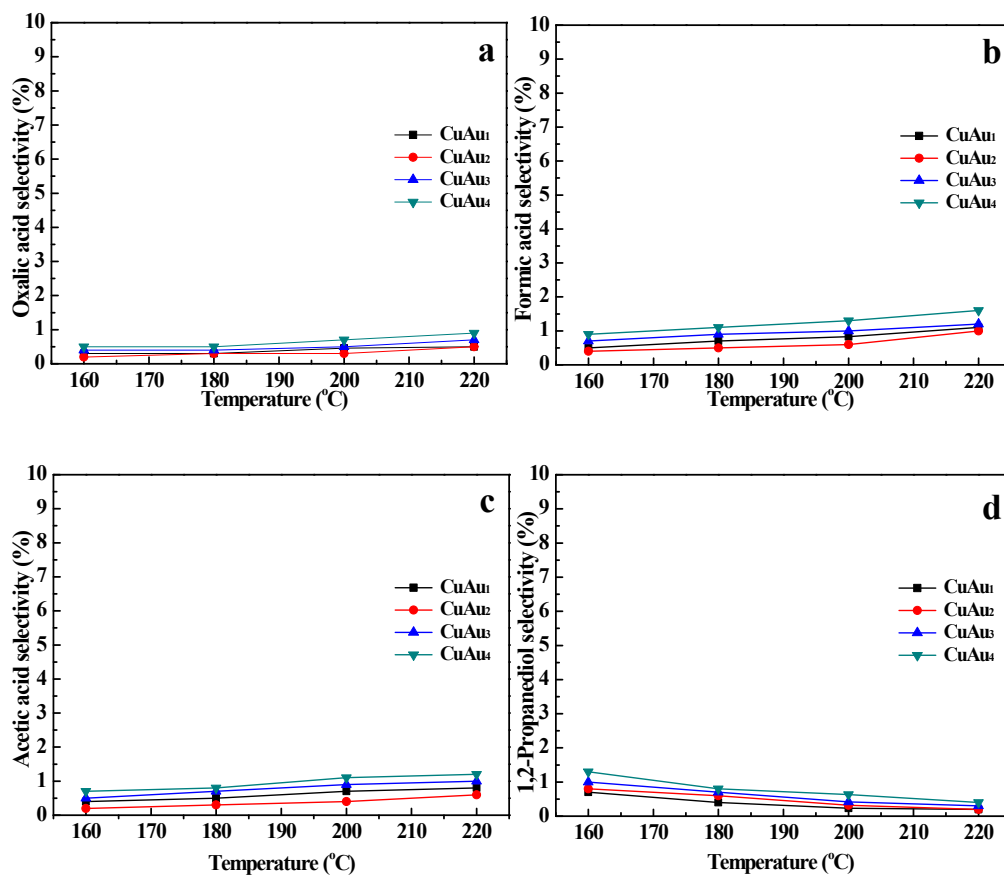

**Fig. S2.** Catalytic conversion of glycerol catalyzed by the bimetallic CuAu<sub>x</sub> nanoparticle catalysts. Reaction conditions: 100 mL of glycerol aqueous solution with the glycerol concentration of 2 mol L<sup>-1</sup>, NaOH/glycerol mole ratio of 1.1:1, 0.736 g of catalyst, and reaction time of 2 h. (a) selectivity of oxalic acid; (b) selectivity of formic acid; (c) selectivity of acetic acid; (d) selectivity of 1,2-propanediol.

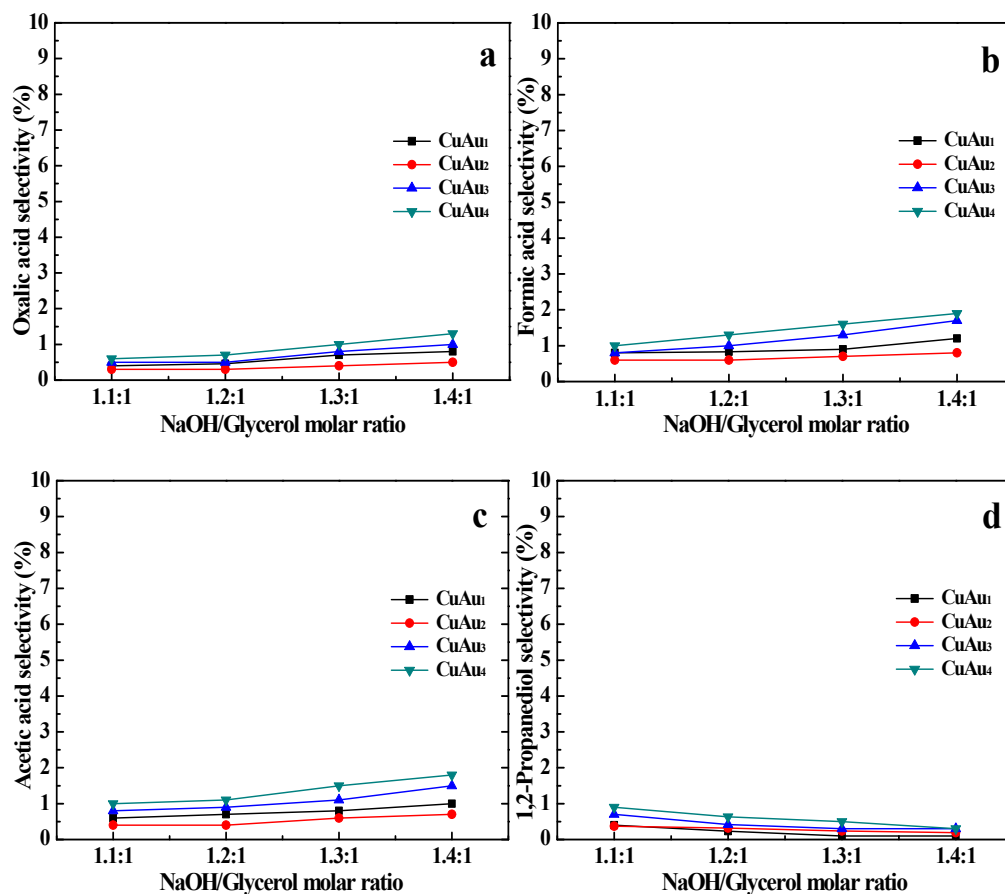

**Fig. S3.** Catalytic conversion of glycerol catalyzed by the bimetallic CuAu<sub>x</sub> nanoparticle catalysts. Reaction conditions: 100 mL of glycerol aqueous solution with the glycerol concentration of 2 mol L<sup>-1</sup>, 0.736 g of catalyst, reaction temperature at 200 °C, and reaction time of 2 h. (a) selectivity of oxalic acid; (b) selectivity of formic acid; (c) selectivity of acetic acid; (d) selectivity of 1,2-propanediol.

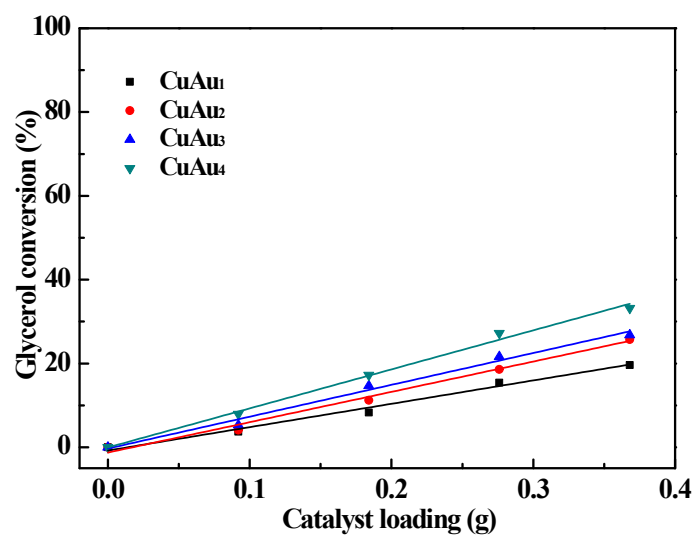

**Fig. S4.** Effect of catalyst loadings on the catalytic conversion of glycerol over the bimetallic CuAu<sub>x</sub> catalysts. Reaction conditions: 100 mL of glycerol aqueous solution with the glycerol concentration of 1.0 mol L<sup>-1</sup>; NaOH concentration of 1.1 mol L<sup>-1</sup>; reaction temperature, 140 °C; reaction time, 1 h; stirring speed, 600 rpm.

| Experimental | Reaction time (h) | Conversions of glycerol (%) | Selectivities of lactic acid (%) |
|--------------|-------------------|-----------------------------|----------------------------------|
| a            | 1                 | trace                       | /                                |
|              | 2                 | trace                       | /                                |
|              | 3                 | trace                       | /                                |
|              | 4                 | 0.8                         | 100                              |
| b            | 1                 | trace                       | /                                |
|              | 2                 | trace                       | 100                              |
|              | 3                 | 1.0                         | 100                              |
|              | 4                 | 2.2                         | 99.6                             |

Table S1 Catalytic conversion of glycerol with the use of sole NaOH or CuAu<sub>2</sub> catalyst

<sup>a</sup>The experimental conditions: (a) glycerol aqueous solution, 2.0 mol L<sup>-1</sup>, 100 mL; NaOH/glycerol mole ratio, 1.1:1; reaction temperature, 200 °C. (b) glycerol aqueous solution, 2.0 mol L<sup>-1</sup>, 100 mL; CuAu<sub>2</sub>, 0.736 g; reaction temperature, 200 °C.
